# Supplementary material for: An in vitro model to assess the immunosuppressive effect of tick saliva on the mobilization of inflammatory monocyte-derived cells
Source: PubMed Central journal article supplement (PMC4586012; doi:10.1186/s13567-015-0229-5), 2015-09-28

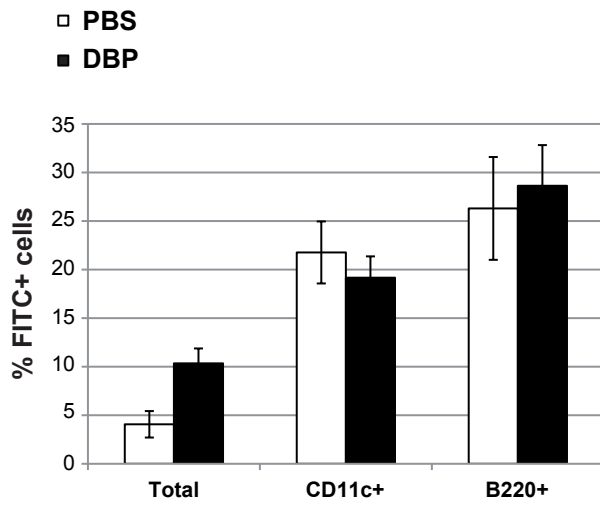

Supplement: 13567_2015_229_MOESM3_ESM.pdf [file 13567_2015_229_MOESM3_ESM.pdf]
